# Supplementary material for: Isoporous Polyvinylidene Fluoride Membranes with Selective Skin Layers via a Thermal-Vapor Assisted Phase Separation Method for Industrial Purification Applications
Source: MDPI journal article supplement (doi:10.3390/membranes12030250), 2022-02-22
Supplement: s1 [file s1]

# Isoporous Polyvinylidene Fluoride Membranes with Selective Skin Layers via a Thermal-Vapor Assisted Phase Separation Method for Industrial Purification Applications

Da Han Choi <sup>1,2</sup>, Sei Kwon <sup>1</sup>, Youngmin Yoo <sup>1</sup>, In-Chul Kim <sup>1</sup>, Hosik Park <sup>1,3</sup>, You-In Park <sup>1</sup>, Sung Yun Yang <sup>2,\*</sup>, Seung-Eun Nam<sup>1,\*</sup> and Young Hoon Cho<sup>1,3,\*</sup>

<sup>1</sup> Green Carbon Research Center, Chemical Process Division, Korea Institute of Chemical Technology (KRICT), Daejeon, Republic of Korea

<sup>2</sup> Department of Organic Materials Engineering, Chungnam National University, Daejeon, Republic of Korea

<sup>3</sup> Department of Advanced Materials and Chemical Engineering, University of Science & Technology (UST), Daejeon, Republic of Korea

\* Correspondence: sungyun@cnu.ac.kr, senam@kRICT.re.kr, yhcho@kRICT.re.kr

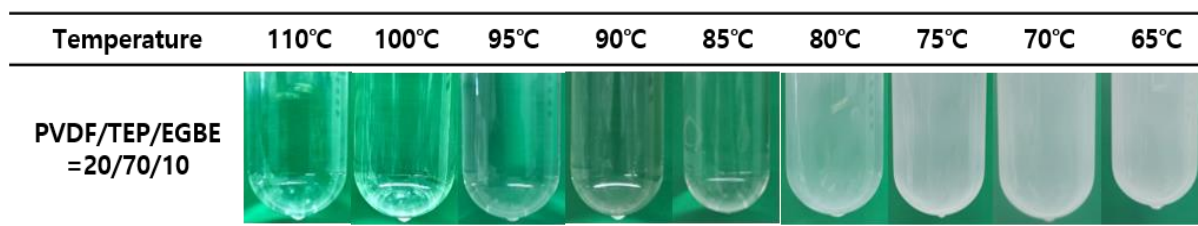

**Figure S1.** Photo images of the TEP-based dope solution at different temperatures.

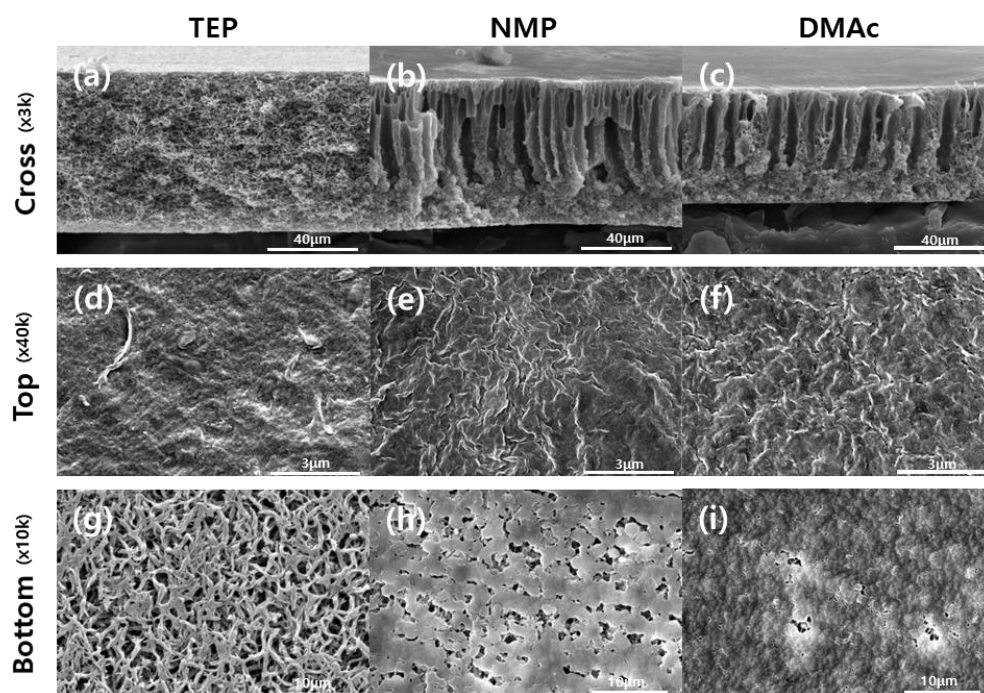

**Figure S2.** Cross-sectional (a-c) and surface morphologies (d-i) of membranes (PTE-1, PNE, PDE).

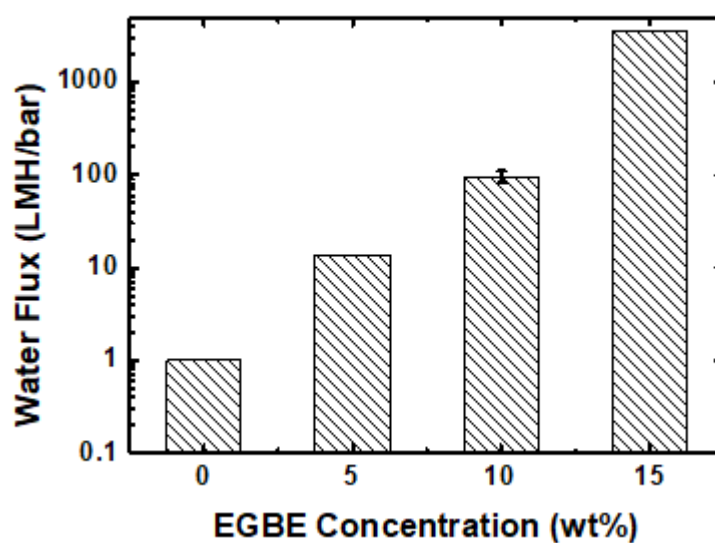

**Figure S3.** The effect of the EGBE concentration on the water flux.

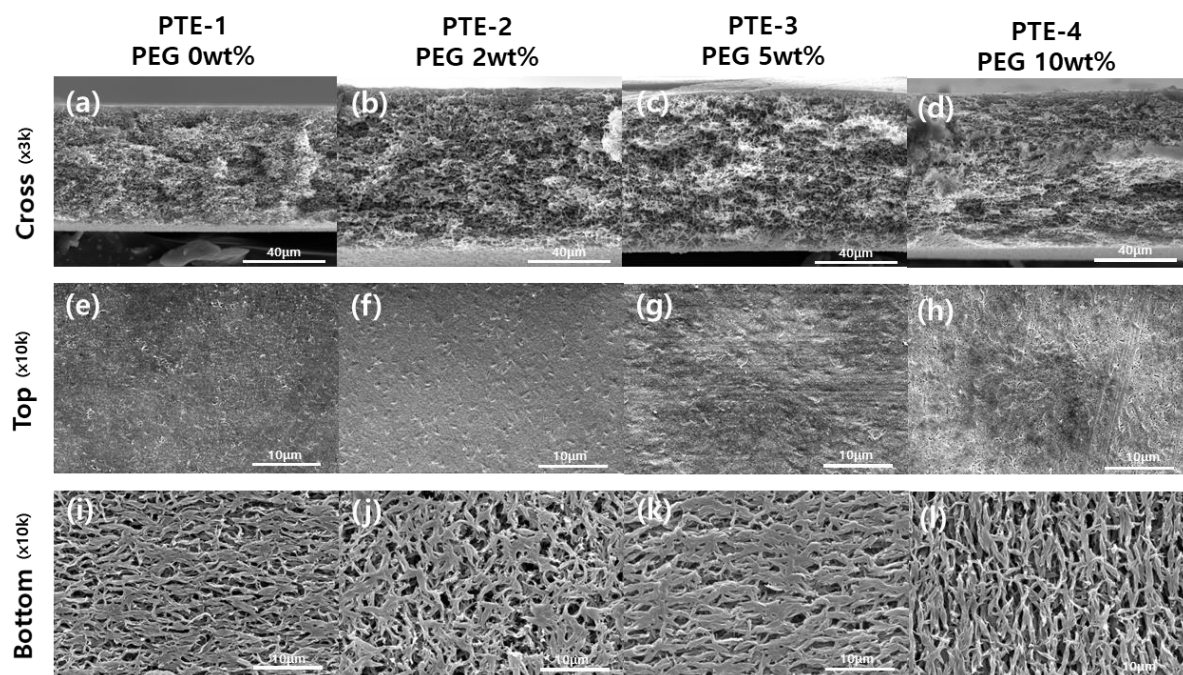

**Figure S4.** Cross-sectional (a-h) and surface morphologies (e-l) of PTE membranes with different PEG concentrations.

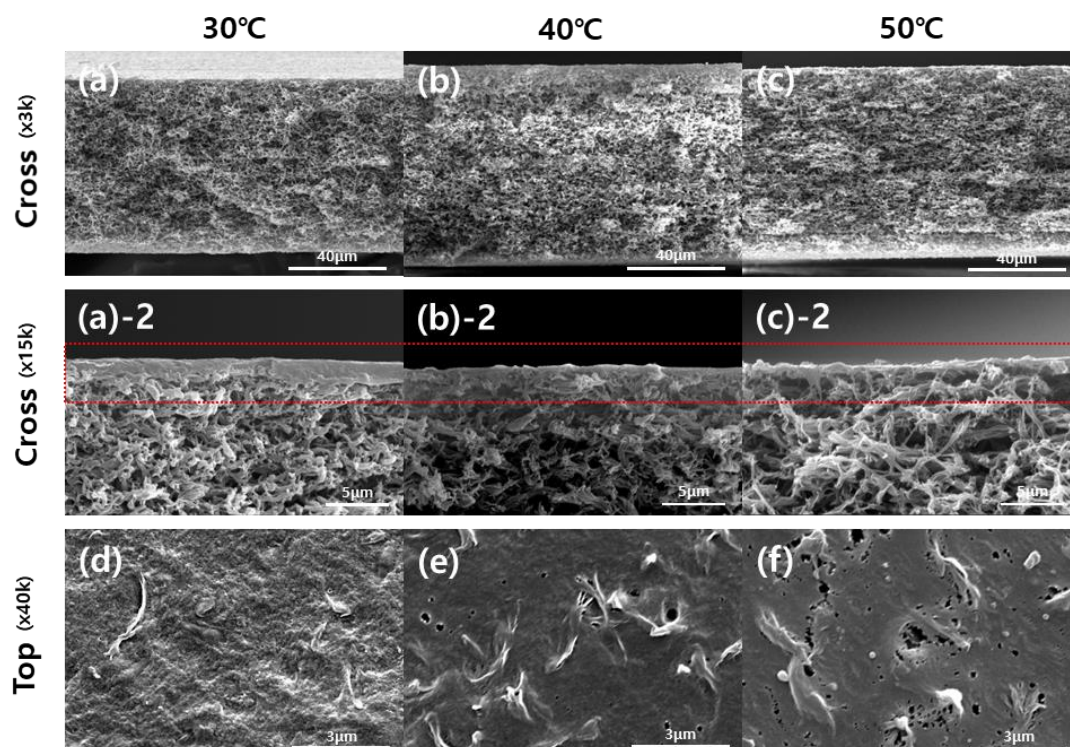

**Figure S5.** Effects of temperature on the skin layer thickness. Relative humidity: 50%, vapor exposure time: 30 sec.



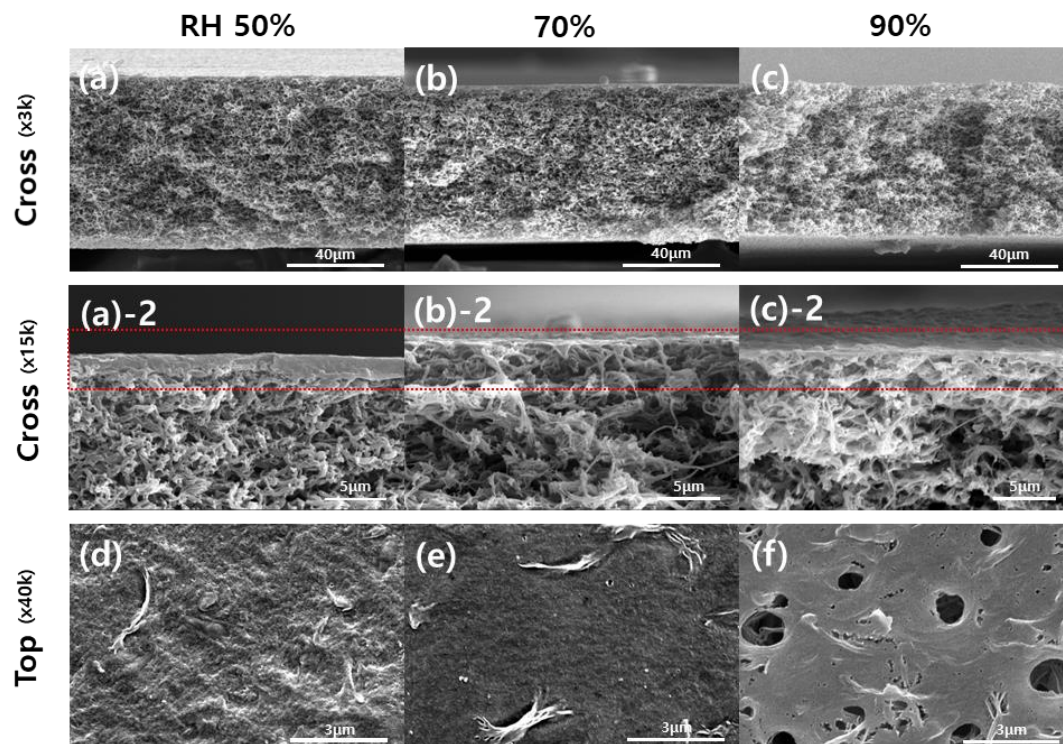

**Figure S6.** Effects of relative humidity on the active layer thickness and the surface morphologies. Chamber temperature: 30  $^{\circ}\text{C}$ , vapor exposure time : 30 sec.

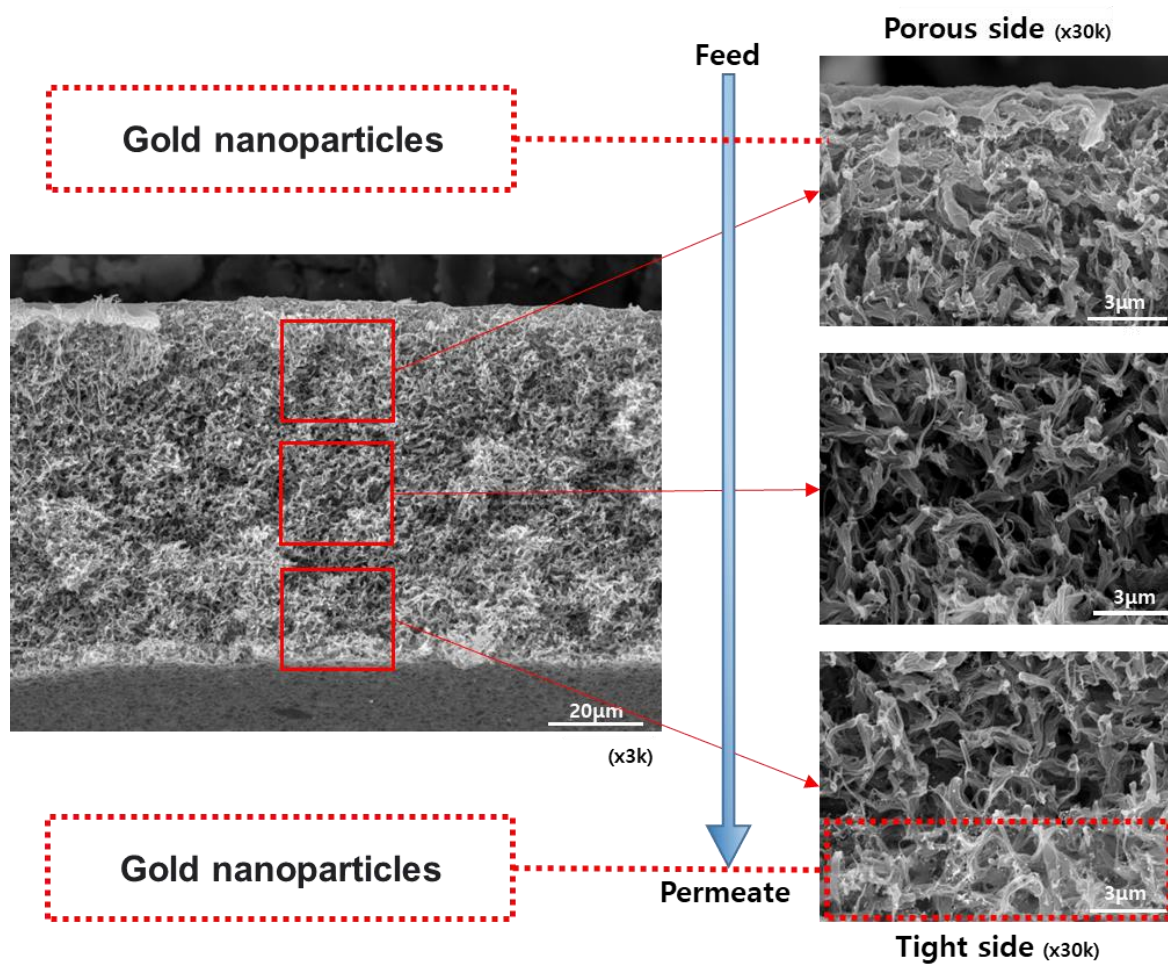

**Figure S7.** SEM images of the PTE-3 membrane after 20 nm gold nanoparticle filtration.
